# Supplementary material
Source: HighWire-hosted journal article supplement (https://jnm.snmjournals.org/highwire/filestream/94779/field_highwire_adjunct_files/0/159798_Supplemental_Data.pdf)
Supplement: 159798_Supplemental_Data.pdf [file 159798_Supplemental_Data.pdf]

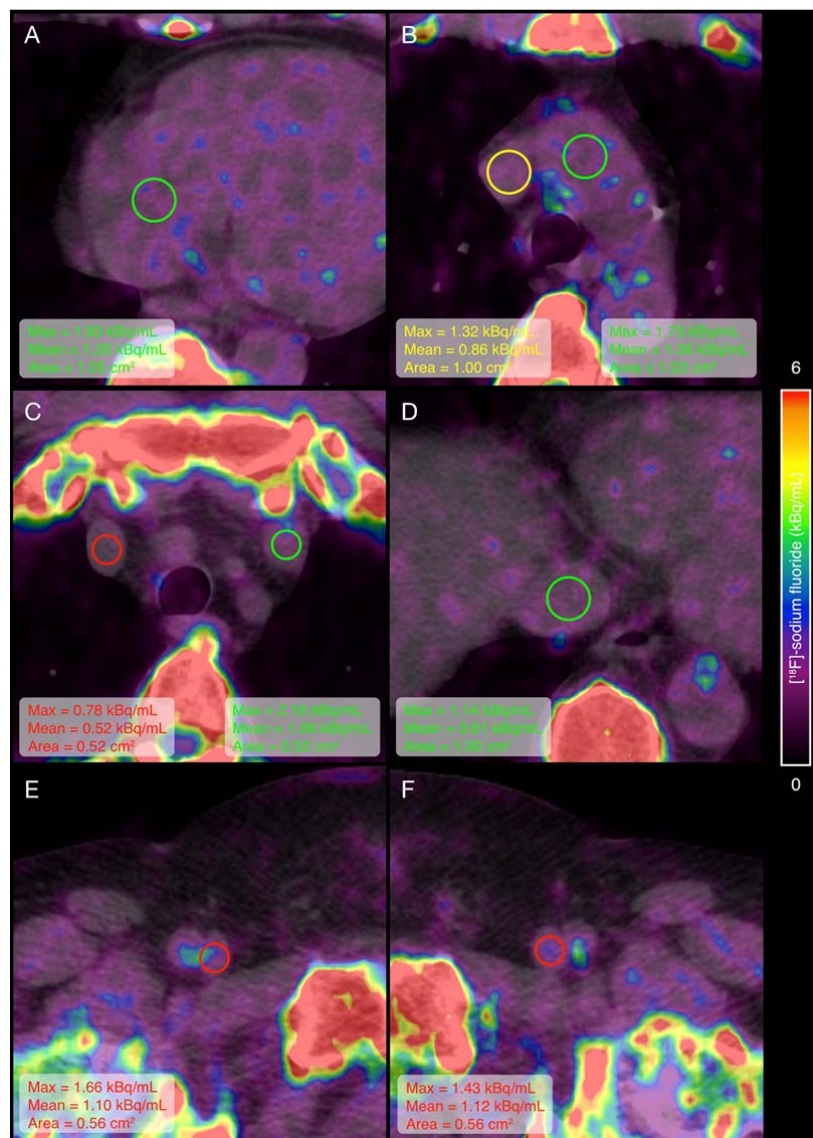

**SUPPLEMENTAL FIGURE 1** – Illustration demonstrating quantification of mean  $^{18}\text{F}$ -NaF blood activity (bloodNaFMEAN). On axially oriented  $^{18}\text{F}$ -NaF PET/CT images, a circular region of interest (ROI), with an approximate area of 1 cm<sup>2</sup>, was drawn in the center of the right atrium (A), superior vena cava (B), aortic arch (B), and proximal inferior vena cava (D). Similarly, a ROI, with an approximate area of 0.5 cm<sup>2</sup>, was drawn in the right and left internal jugular vein (C) and right (E) and left femoral vein (F). Per ROI, the mean  $^{18}\text{F}$ -NaF activity (kBq/mL) was determined.

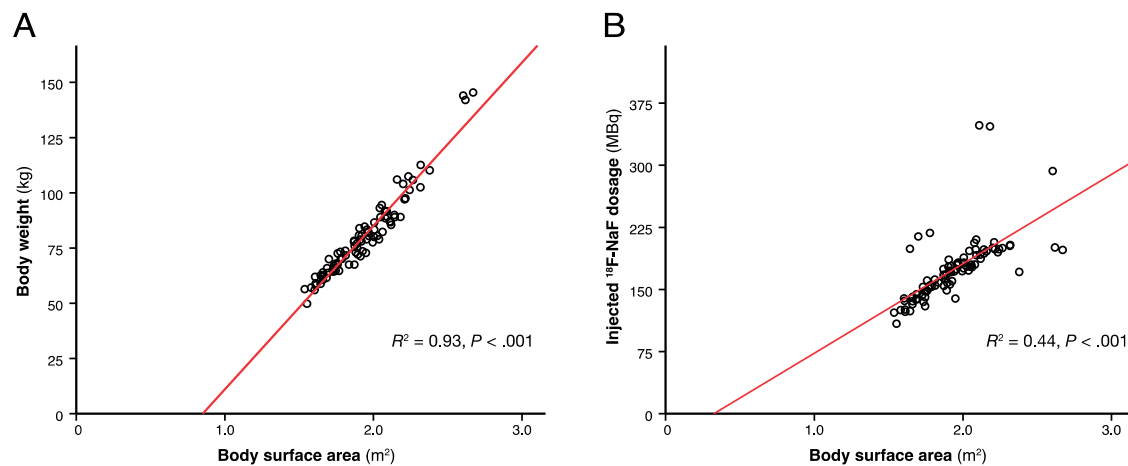

**SUPPLEMENTAL FIGURE 2** – Scatter plot of body weight (**A**) and injected dose (**B**) against body surface area. Body surface area significantly associated to body weight ( $R^2 = 0.93, P < .001$ ) and injected  $^{18}\text{F}$ -NaF dose ( $R^2 = 0.44, P < .001$ ) indicating multicollinearity. Multicollinearity was confirmed statistically by a tolerance statistic of 0.05, 0.06, and 0.35 for body surface area, body weight, and injected dose, respectively. Outliers observed in plot **B** are explained by differences in manual ( $n = 17$ ) and automatic  $^{18}\text{F}$ -NaF administration ( $n = 72$ ).

$$\begin{aligned}
\text{SUV} &= \frac{\text{Na}^{18}\text{F activity (kBq} \cdot \text{mL}^{-1}) \cdot \text{body weight (g)}}{\text{Injected dose (MBq)}} = \\
&= \frac{\text{Na}^{18}\text{F activity (kBq} \cdot \text{mL}^{-1}) \cdot \text{body weight (g)}}{2.2 \text{ MBq} \cdot \text{body weight (kg)}} = \\
&= \frac{\text{Na}^{18}\text{F activity (kBq} \cdot \text{mL}^{-1})}{2.2 \text{ kBq}}
\end{aligned}$$

**SUPPLEMENTAL FIGURE 3** – Equation to normalize  $^{18}\text{F}$ -NaF uptake (kBq/mL) in the target of interest to injected dose (MBq) and body weight (g) known as the standardized uptake value (SUV). Body weight dependent  $^{18}\text{F}$ -NaF dose administration makes calculation of SUV problematic.

SUPPLEMENTAL TABLE 1 – Summary of PET/CT system specifications and image reconstruction parameters

| Vender and type          | System specifications |          | Image reconstruction parameters |                 |                       |         |
|--------------------------|-----------------------|----------|---------------------------------|-----------------|-----------------------|---------|
|                          | PET scintillator      | CT       | Iterations/subsets              | Post-hoc filter | Reconstruction matrix | ToF/PSF |
| GE Discovery STE (1)     | BGO                   | 16-slice | 2/28                            | 6 mm            | 128x128               | No/No   |
| GE Discovery VCT (1)     | BGO                   | 64-slice | 2/28                            | 6 mm            | 128x128               | No/No   |
| GE Discovery RX (2)      | LYSO                  | 16-slice | 2/21                            | 6 mm            | 128x128               | No/No   |
| GE Discovery 690/710 (3) | LYSO                  | 64-slice | 3/24                            | 5 mm            | 256x256               | Yes/Yes |

BGO = bismuth germanate, LYSO = lutetium yttrium oxyorthosilicate, ToF/PSF = time-of-flight and/or point spread function image reconstruction.

1. Teräs M, Tolvanen T, Johansson JJ, et al. Performance of the new generation of whole-body PET/CT scanners: Discovery STE and Discovery VCT. *Eur J Nucl Med Mol Imaging*. 2007;34:1683-92.
2. Kemp BJ, Kim C, Williams JJ, et al., National Electrical Manufacturers Association (NEMA). NEMA NU 2-2001 performance measurements of an LYSO-based PET/CT system in 2D and 3D acquisition modes. *J Nucl Med*. 2006;47:1960-7.
3. Bettinardi V, Presotto L, Rapisarda E, et al. Physical performance of the new hybrid PET/CT Discovery-690. *Med Phys*. 2011;38:5394-411.

SUPPLEMENTAL TABLE 2 – Intra-rater reliability and agreement of NaFmax and bloodNaFmean

|                      | ICC    | 95 % CI       | Mean difference<br>(kBq/mL) | 95% Limits of<br>agreement |
|----------------------|--------|---------------|-----------------------------|----------------------------|
| <b>NaFmax</b>        |        |               |                             |                            |
| - Ascending aorta    | 0.99 * | 0.98 to 1.00  | 0.02                        | -0.09 to 0.12              |
| - Aortic arch        | 1.00 * | 0.99 to 1.00  | -0.02                       | -0.11 to 0.07              |
| - Descending aorta   | 1.00 * | 0.99 to 1.00  | 0.01                        | -0.09 to 0.11              |
| - Coronary arteries  | 1.00 * | 1.00 to 1.00  | 0.00                        | -0.04 to 0.04              |
| <b>bloodNaFmean</b>  |        |               |                             |                            |
| - Right atrium       | 0.90 * | 0.60 to 0.97  | -0.06                       | -0.23 to 0.11              |
| - Aortic arch        | 0.94 * | 0.63 to 0.99  | -0.08                       | -0.27 to 0.10              |
| - Right jugular vein | 0.95 * | 0.81 to 0.99  | -0.04                       | -0.18 to 0.10              |
| - Left jugular vein  | 0.58   | -0.01 to 0.88 | 0.12                        | -0.62 to 0.86              |
| - Superior vena cava | 0.94 * | 0.77 to 0.98  | -0.02                       | -0.13 to 0.10              |
| - Inferior vena cava | 0.98 * | 0.93 to 1.00  | 0.00                        | -0.10 to 0.11              |
| - Right femoral vein | 0.97 * | 0.79 to 0.99  | 0.06                        | -0.08 to 0.19              |
| - Left femoral vein  | 0.88 * | 0.60 to 0.97  | -0.03                       | -0.32 to 0.26              |

ICC = intraclass correlation coefficient (two-way random effects model assessing absolute agreement of single measures). CI = confidence interval. \*  $P < .001$ .

SUPPLEMENTAL TABLE 3 – Inter-rater reliability and agreement of NaFmax and bloodNaFmean

|                                 | ICC    | 95 % CI       | Mean difference<br>(kBq/mL) | 95% Limits of<br>agreement |
|---------------------------------|--------|---------------|-----------------------------|----------------------------|
| <b>NaF<sub>MAX</sub></b>        |        |               |                             |                            |
| - Ascending aorta               | 0.98 * | 0.90 to 1.00  | 0.06                        | -0.11 to 0.23              |
| - Aortic arch                   | 1.00 * | 0.98 to 1.00  | 0.00                        | -0.14 to 0.13              |
| - Descending aorta              | 0.99 * | 0.97 to 1.00  | 0.00                        | -0.15 to 0.16              |
| - Coronary arteries             | 1.00 * | 1.00 to 1.00  | 0.00                        | 0.00 to 0.00               |
| <b>BLOOD NaF<sub>MEAN</sub></b> |        |               |                             |                            |
| - Right atrium                  | 0.79 * | 0.28 to 0.94  | -0.11                       | -0.39 to 0.17              |
| - Aortic arch                   | 0.95 * | 0.82 to 0.99  | -0.05                       | -0.24 to 0.14              |
| - Right jugular vein            | 0.95 * | 0.82 to 0.99  | 0.01                        | -0.16 to 0.17              |
| - Left jugular vein             | 0.45   | -0.17 to 0.83 | -0.16                       | -1.04 to 0.72              |
| - Superior vena cava            | 0.98 * | 0.94 to 1.00  | -0.01                       | -0.07 to 0.05              |
| - Inferior vena cava            | 1.00 * | 0.99 to 1.00  | 0.00                        | -0.04 to 0.05              |
| - Right femoral vein            | 0.96 * | 0.88 to 0.99  | -0.03                       | -0.20 to 0.14              |
| - Left femoral vein             | 0.89 * | 0.61 to 0.97  | 0.01                        | -0.29 to 0.31              |

ICC = intraclass correlation coefficient (two-way random effects model assessing absolute agreement of single measures). CI = confidence interval. \*  $P < .001$ .

SUPPLEMENTAL TABLE 4 – Determinants of  $^{18}\text{F}$ -NaF uptake in the aortic arch

|                               | Regression coefficient | $\beta$ | Adjusted $R^2$ | P value |
|-------------------------------|------------------------|---------|----------------|---------|
| <b>1. NaFmax, kBq/mL</b>      |                        |         | .65            | < .001  |
| <b>Intercept, kBq/mL</b>      | 3.23 (2.62 to 3.77)    |         |                | < .001  |
| <b>Blood activity, kBq/mL</b> | 0.97 (0.68 to 1.40)    | 0.39    |                | < .001  |
| <b>PET/CT system</b>          |                        |         |                |         |
| - GE Discovery STE            | -1.78 (-2.26 to -1.26) | -0.72   |                | < .001  |
| - GE Discovery VCT            | -1.78 (-2.27 to -1.29) | -0.68   |                | < .001  |
| - GE Discovery RX             | -1.42 (-1.85 to -1.00) | -0.62   |                | < .001  |
| <b>2. TBRmax/mean</b>         |                        |         | .52            | < .001  |
| <b>Intercept</b>              | 4.24 (3.44 to 4.91)    |         |                | < .001  |
| <b>Blood activity, kBq/mL</b> | -1.15 (-1.64 to -0.75) | -0.58   |                | < .001  |
| <b>Injected dose, 100 MBq</b> | 0.46 (-0.04 to 1.09)   | 0.21    |                | .058    |
| <b>PET/CT system</b>          |                        |         |                |         |
| - GE Discovery STE            | -1.33 (-1.75 to -0.96) | -0.69   |                | < .001  |
| - GE Discovery VCT            | -1.19 (-1.62 to -0.79) | -0.58   |                | < .001  |
| - GE Discovery RX             | -1.15 (-1.47 to -0.84) | -0.63   |                | < .001  |
| <b>3. bsNaFmax, kBq/mL</b>    |                        |         | .55            | < .001  |
| <b>Intercept, kBq/mL</b>      | 3.18 (2.82 to 3.59)    |         |                | < .001  |
| <b>PET/CT system</b>          |                        |         |                |         |
| - GE Discovery STE            | -1.78 (-2.28 to -1.31) | -0.82   |                | < .001  |
| - GE Discovery VCT            | -1.76 (-2.24 to -1.33) | -0.78   |                | < .001  |
| - GE Discovery RX             | -1.42 (-1.90 to -0.98) | -0.71   |                | < .001  |

Multivariable linear regression assessing the dependence of aortic arch  $^{18}\text{F}$ -NaF uptake on superior vena cava blood activity, renal function, injected dose, circulating time, and PET/CT system. "PET/CT system" was entered as categorical variable into the model with the GE Discovery 690/710 as reference system. Stepwise selection of variables, based on Akaike's information criterion, was performed by a backward elimination strategy. The following quantifiers of arterial  $^{18}\text{F}$ -NaF uptake were evaluated: NaFmax, TBRmax/mean, and bsNaFmax.  $\beta$  = standardized regression coefficient. The 95 % confidence interval is presented in parentheses.

SUPPLEMENTAL TABLE 5 – Determinants of  $^{18}\text{F}$ -NaF uptake in the descending thoracic aorta

|                                             | Regression coefficient | $\beta$ | Adjusted $R^2$ | P value |
|---------------------------------------------|------------------------|---------|----------------|---------|
| <b>1. NaFmax, kBq/mL</b>                    |                        |         | .69            | < .001  |
| <b>Intercept, kBq/mL</b>                    | 3.84 (2.94 to 4.66)    |         |                | < .001  |
| <b>Blood activity, kBq/mL</b>               | 0.92 (0.69 to 1.20)    | .44     |                | < .001  |
| <b>MDRD-eGFR, mL/min/1.73 m<sup>2</sup></b> | -0.01 (-0.02 to -0.00) | -.15    |                | .014    |
| <b>PET/CT system</b>                        |                        |         |                |         |
| - GE Discovery STE                          | -1.40 (-1.78 to -1.01) | -.69    |                | < .001  |
| - GE Discovery VCT                          | -1.36 (-1.76 to -0.95) | -.63    |                | < .001  |
| - GE Discovery RX                           | -1.16 (-1.51 to -0.80) | -.61    |                | < .001  |
| <b>2. TBRmax/mean</b>                       |                        |         | .57            | < .001  |
| <b>Intercept</b>                            | 4.83 (4.01 to 5.71)    |         |                | < .001  |
| <b>Blood activity, kBq/mL</b>               | -1.21 (-1.70 to -0.87) | -.67    |                | < .001  |
| <b>MDRD-eGFR, mL/min/1.73 m<sup>2</sup></b> | -0.01 (-0.02 to 0.00)  | -.14    |                | .086    |
| <b>Injected dose, 100 MBq</b>               | 0.42 (-0.06 to 0.89)   | .21     |                | .054    |
| <b>PET/CT system</b>                        |                        |         |                |         |
| - GE Discovery STE                          | -1.06 (-1.46 to -0.73) | -.60    |                | < .001  |
| - GE Discovery VCT                          | -0.85 (-1.26 to -0.47) | -.46    |                | < .001  |
| - GE Discovery RX                           | -0.93 (-1.28 to -0.66) | -.57    |                | < .001  |
| <b>3. bsNaFmax, kBq/mL</b>                  |                        |         | .44            | < .001  |
| <b>Intercept, kBq/mL</b>                    | 3.71 (2.91 to 4.46)    |         |                | < .001  |
| <b>MDRD-eGFR, mL/min/1.73 m<sup>2</sup></b> | -0.01 (-0.02 to -0.00) | -0.18   |                | .016    |
| <b>PET/CT system</b>                        |                        |         |                |         |
| - GE Discovery STE                          | -1.39 (-1.77 to -1.04) | -0.81   |                | < .001  |
| - GE Discovery VCT                          | -1.33 (-1.69 to -0.97) | -0.73   |                | < .001  |
| - GE Discovery RX                           | -1.16 (-1.51 to -0.82) | -0.73   |                | < .001  |

Multivariable linear regression assessing the dependence of descending thoracic aorta  $^{18}\text{F}$ -NaF uptake on superior vena cava blood activity, renal function, injected dose, circulating time, and PET/CT system. “PET/CT system” was entered as categorical variable into the model with the GE Discovery 690/710 as reference system. Stepwise selection of variables, based on Akaike’s information criterion, was performed by a backward elimination strategy. The following quantifiers of arterial  $^{18}\text{F}$ -NaF uptake were evaluated: NaFmax, TBRmax/mean, and bsNaFmax.  $\beta$  = standardized regression coefficient. The 95 % confidence interval is presented in parentheses.



SUPPLEMENTAL TABLE 6 – Determinants of  $^{18}\text{F}$ -NaF uptake in coronary arteries

|                                  | Regression coefficient | $\beta$ | Adjusted $R^2$ | P value |
|----------------------------------|------------------------|---------|----------------|---------|
| <b>1. NaFmax, kBq/mL</b>         |                        |         | .57            | < .001  |
| <b>Intercept, kBq/mL</b>         | 0.32 (-3.80 to 3.11)   |         |                | .841    |
| <b>Blood activity, kBq/mL</b>    | 0.86 (0.54 to 1.25)    | .40     |                | < .001  |
| <b>Injected dose, 100 MBq</b>    | 0.40 (-0.04 to 1.14)   | .17     |                | .156    |
| <b>Circulating time, minutes</b> | 0.03 (-0.00 to 0.07)   | .13     |                | .091    |
| <b>PET/CT system</b>             |                        |         |                |         |
| - GE Discovery STE               | -1.33 (-1.71 to -0.94) | -.63    |                | < .001  |
| - GE Discovery VCT               | -1.17 (-1.56 to -0.75) | -.53    |                | < .001  |
| - GE Discovery RX                | -1.39 (-1.79 to -1.01) | -.71    |                | < .001  |
| <b>2. TBRmax/mean</b>            |                        |         | .55            | < .001  |
| <b>Intercept</b>                 | 4.55 (3.58 to 5.30)    |         |                | < .001  |
| <b>Blood activity, kBq/mL</b>    | -1.63 (-2.37 to -1.09) | -.68    |                | < .001  |
| <b>Injected dose, 100 MBq</b>    | 0.79 (0.26 to 1.61)    | .30     |                | .020    |
| <b>PET/CT system</b>             |                        |         |                |         |
| - GE Discovery STE               | -1.04 (-1.47 to -0.67) | -.44    |                | < .001  |
| - GE Discovery VCT               | -0.58 (-1.00 to -0.16) | -.23    |                | .031    |
| - GE Discovery RX                | -1.13 (-1.48 to -0.81) | -.51    |                | < .001  |
| <b>3. bsNaFmax, kBq/mL</b>       |                        |         | .43            | < .001  |
| <b>Intercept, kBq/mL</b>         | 0.19 (-3.73 to 2.87)   |         |                | .910    |
| <b>Injected dose, 100 MBq</b>    | 0.35 (-0.00 to 1.09)   | .17     |                | .168    |
| <b>Circulating time, minutes</b> | 0.03 (-0.00 to 0.07)   | .15     |                | .076    |
| <b>PET/CT system</b>             |                        |         |                |         |
| - GE Discovery STE               | -1.32 (-1.67 to -0.93) | -.72    |                | < .001  |
| - GE Discovery VCT               | -1.11 (-1.49 to -0.73) | -.57    |                | < .001  |
| - GE Discovery RX                | -1.39 (-1.78 to -1.00) | -.81    |                | < .001  |

Multivariable linear regression assessing the dependence of coronary artery  $^{18}\text{F}$ -NaF uptake on superior vena cava blood activity, renal function, injected dose, circulating time, and PET/CT system. "PET/CT system" was entered as categorical variable into the model with the GE Discovery 690/710 as reference system. Stepwise selection of variables, based on Akaike's information criterion, was performed by a backward elimination strategy. The following quantifiers of arterial  $^{18}\text{F}$ -NaF uptake were evaluated: NaFmax, TBRmax/mean, and bsNaFmax.  $\beta$  = standardized regression coefficient. The 95 % confidence interval is presented in parentheses.
